# Supplementary material for: Ensemble Decision Tree Models Using RUSBoost for Estimating Risk of Iron Failure in Drinking Water Distribution Systems
Source: Springer Nature journal article supplement (doi:10.1007/s11269-017-1595-8), 2017-03-01
Supplement: MOESM1 [file 12131174]

**Supplementary Material 1 – all matrix parameters**

Data Matrix Parameter List

| **Parameter name** | **Definition** |
| --- | --- |
| dma | DMA reference number |
| wqz | WQZ reference number |
| population | Number of people supplied by DMA |
| iron_Nsamples | Number of samples featuring an iron measurement in the DMA, over the year |
| iron_Nfails | Number of iron failures in the DMA, over the year |
| iron_av | Median average iron content (mg/l) in the DMA, over the year |
| mang_Nsamples | Number of samples featuring a manganese measurement in the DMA, over the year |
| mang_Nfails | Number of manganese failures in the DMA, over the year |
| mang_av | Median average manganese content (mg/l) in the DMA, over the year |
| turb_Nsamples | Number of samples featuring a turbidity measurement in the DMA, over the year |
| turb_Nfails | Number of turbidity failures in the DMA, over the year |
| turb_av | Median average turbidity (FTU) in the DMA, over the year |
| chlor_total_Nsamples | Number of samples featuring a chlorine measurement in the DMA, over the year |
| chlor_total_av | Median average total chlorine content (mg/l) in the DMA, over the year |
| chlor_free_Nsamples | Number of samples featuring a chlorine measurement in the DMA, over the year |
| chlor_free_av | Median average total chlorine content (mg/l) in the DMA, over the year |
| pH_Nsamples | Number of samples featuring a pH measurement in the DMA, over the year |
| pH_av | Median average pH content (mg/l) in the DMA, over the year |
| temp_Nsamples | Number of samples featuring a temperature measurement in the DMA, over the year |
| temp_av | Median average temperature (°C) in the DMA, over the year |
| cc | Number of discolouration customer contacts in the DMA, over the year |
| cc_clusters | Number of discolouration customer contacts in the DMA that are part of WQZ-level clusters, over the year |
| iron_lined | Number of km of lined cast iron pipe main in DMA |
| iron_unlined | Number of km of unlined cast iron pipe in DMA |
| other_material | Number of km of non-iron pipe main (lined or unlined) in DMA |

| **Parameter name** | **Definition** |
| --- | --- |
| total_length | Total length of pipe main in DMA |
| wtw_iron_Nsamples | Number of samples used for calculating median average iron content (mg/l) in supply to the DMA from WTW(s) over the year |
| wtw_iron_av | Median average iron content (mg/l) in supply to the DMA from WTW(s) over the year |
| wtw_mang_Nsamples | Number of samples used for calculating median average manganese content (mg/l) in supply to the DMA from WTW(s), over the year |
| wtw_mang_av | Median average manganese content (mg/l) in supply to the DMA from WTW(s), over the year |
| wtw_turb_Nsamples | Number of samples used for calculating median average turbidty (FTU) In supply to the DMA from WTW(s), over the year |
| wtw_turb_av | Median average turbidty (FTU) in supply to the DMA from WTW(s), over the year |
| wtw_chlor_total_Nsamples | Number of samples used for calculating median average total chlorine content (mg/l) in supply to the DMA from WTW(s), over the year |
| wtw_chlor_total_av | Median average total chlorine content (mg/l) in supply to the DMA from WTW(s), over the year |
| wtw_chlor_free_Nsamples | Number of samples used for calculating median average free chlorine content (mg/l) in supply to the DMA from WTW(s), over the year |
| wtw_chlor_free_av | Median average free chlorine content (mg/l) in supply to the DMA from WTW(s), over the year |
| wtw_pH_Nsamples | Number of samples used for calculating median average pH of water supplied to the DMA from WTW(s), over the year |
| wtw_pH_av | Median average pH of water supplied to the DMA from WTW(s), over the year |
| wtw_temp_Nsamples | Number of samples used for calculating median average temperature of water supplied to the DMA from WTW(s), over the year |
| wtw_temp_av | Median average temperature of water supplied to the DMA from WTW(s), over the year |
| srv_iron_Nsamples | Number of samples used for calculating median average iron content (mg/l) in supply to the DMA from SRV(s) over the year |
| srv_iron_av | Median average iron content (mg/l) in supply to the DMA from SRV(s) over the year |
| srv_mang_Nsamples | Number of samples used for calculating median average manganese content (mg/l) in supply to the DMA from SRV(s), over the year |

| **Parameter name** | **Definition** |
| --- | --- |
| srv_mang_av | Median average manganese content (mg/l) in supply to the DMA from SRV(s), over the year |
| srv_turb_Nsamples | Number of samples used for calculating median average turbidty (FTU) In supply to the DMA from SRV(s), over the year |
| srv_turb_av | Median average turbidty (FTU) in supply to the DMA from SRV(s), over the year |
| srv_chlor_total_Nsamples | Number of samples used for calculating median average total chlorine content (mg/l) in supply to the DMA from SRV(s), over the year |
| srv_chlor_total_av | Median average total chlorine content (mg/l) in supply to the DMA from SRV(s), over the year |
| srv_chlor_free_Nsamples | Number of samples used for calculating median average free chlorine content (mg/l) in supply to the DMA from SRV(s), over the year |
| srv_chlor_free_av | Median average free chlorine content (mg/l) in supply to the DMA from SRV(s), over the year |
| srv_pH_Nsamples | Number of samples used for calculating median average pH of water supplied to the DMA from SRV(s), over the year |
| srv_pH_av | Median average pH of water supplied to the DMA from SRV(s), over the year |
| srv_temp_Nsamples | Number of samples used for calculating median average temperature of water supplied to the DMA from SRV(s), over the year |
| srv_temp_av | Median average temperature of water supplied to the DMA from SRV(s), over the year |
| Nflushes_routine | Number of routine flushing operations in DMA, over the year |
| Nflushes_reactive | Number of reactive flushing operations in DMA, over the year |
| Nbursts | Number of bursts in DMA, over the year |
